# Supplementary material
Source: Springer Nature journal article supplement (http://www.springermedizin.de/resource/supplementary/12882_2008_100_MOESM1_ESM.pdf/9454992)

A

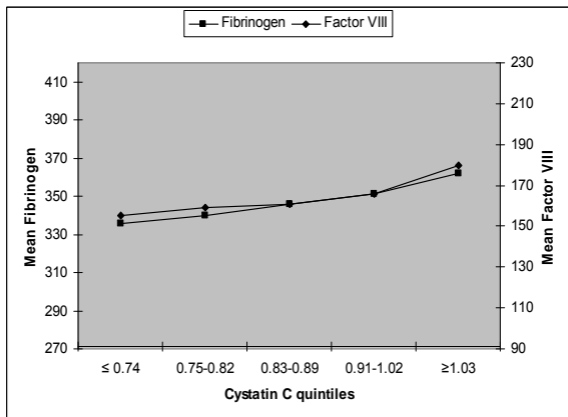

B

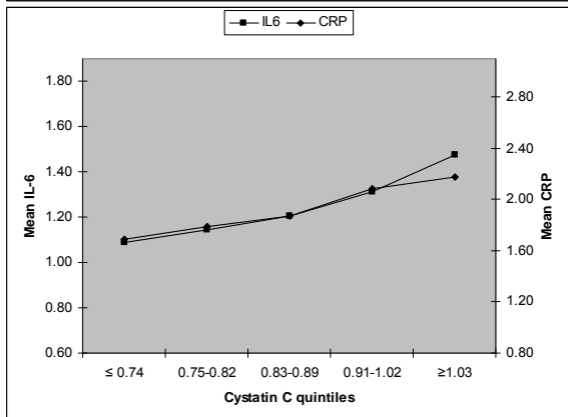

C

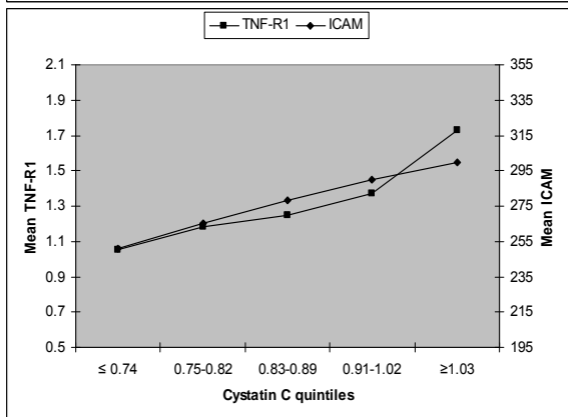

Supplement: MOESM1 [file 9454992]
